# Supplementary material
Source: PubMed Central journal article supplement (PMC5742081)
Supplement: NIHMS908529-supplement-1.pdf [file NIHMS908529-supplement-1.pdf]

**Table S1. Initial CARDIA examination characteristics compared for women included and excluded from this analysis**

| Variable                                   | Included<br>N=820 | Excluded<br>N=1967 | Excluded, by reason for exclusion: |                      |               |
|--------------------------------------------|-------------------|--------------------|------------------------------------|----------------------|---------------|
|                                            |                   |                    | Parous at year 0<br>N=1008         | Nulliparous<br>N=862 | Other<br>N=97 |
| Age (years)                                | 23.7 ± 3.7        | 25.4 ± 3.6         | 26.0 ± 3.4                         | 24.9 ± 3.6           | 23.0 ± 3.7    |
| Race                                       |                   |                    |                                    |                      |               |
| Black                                      | 331 (40.4)        | 1154 (58.7)        | 734 (72.8)                         | 372 (43.2)           | 48 (49.5)     |
| White                                      | 489 (59.6)        | 812 (41.3)         | 274 (27.2)                         | 489 (56.8)           | 49 (50.5)     |
| Education                                  |                   |                    |                                    |                      |               |
| High school or less                        | 225 (27.4)        | 832 (42.3)         | 560 (55.6)                         | 238 (27.6)           | 34 (35.1)     |
| More than high school                      | 595 (72.6)        | 1135 (57.7)        | 448 (44.4)                         | 624 (72.4)           | 63 (65.0)     |
| eGFR (ml/min/1.73m <sup>2</sup> )          | 121.5 ± 16.7      | 123.8 ± 16.9       | 126.0 ± 16.9                       | 121.4 ± 16.6         | 123.0 ± 16.8  |
| Smoking status                             |                   |                    |                                    |                      |               |
| Never                                      | 537 (65.6)        | 1033 (52.8)        | 473 (47.3)                         | 506 (58.8)           | 54 (57.5)     |
| Former                                     | 104 (12.7)        | 284 (14.5)         | 145 (14.5)                         | 125 (14.5)           | 14 (14.9)     |
| Current                                    | 178 (21.7)        | 638 (32.6)         | 383 (38.3)                         | 229 (26.6)           | 26 (27.7)     |
| BMI (kg/m <sup>2</sup> )                   | 23.2 ± 4.6        | 25.1 ± 6.2         | 25.7 ± 6.4                         | 24.7 ± 5.9           | 23.7 ± 5.1    |
| Waist circumference (cm)                   | 71.0 ± 9.1        | 75.8 ± 12.5        | 77.2 ± 12.7                        | 74.5 ± 12.3          | 71.9 ± 10.3   |
| Fasting glucose (mg/100ml)                 | 79.4 (7.3)        | 81.8 (9.2)         | 81.8 (22.1)                        | 81.9 (20.3)          | 80.4 ± 8.8    |
| LDL-C (mg/dl)                              | 106.4 ± 30.1      | 109.2 ± 30.9       | 109.9 ± 30.8                       | 108.3 ± 30.4         | 110.4 ± 35.8  |
| Systolic BP (mmHg)                         | 105.7 ± 8.9       | 107.0 ± 10.2       | 107.1 ± 10.6                       | 107.0 ± 9.7          | 106.5 ± 10.3  |
| Metabolic syndrome                         |                   |                    |                                    |                      |               |
| Yes                                        | 5 (0.6)           | 47 (2.4)           | 33 (3.3)                           | 13 (1.5)             | 1 (1.0)       |
| No                                         | 815 (99.4)        | 1920 (97.6)        | 975 (96.7)                         | 849 (98.5)           | 96 (99.0)     |
| Family history of diabetes <sup>a</sup>    |                   |                    |                                    |                      |               |
| Yes                                        | 349 (42.6)        | 902 (45.9)         | 522 (51.8)                         | 340 (39.4)           | 40 (41.2)     |
| No                                         | 471 (57.4)        | 1065 (54.1)        | 486 (48.2)                         | 522 (60.6)           | 57 (58.8)     |
| Family history of CKD <sup>b</sup>         |                   |                    |                                    |                      |               |
| Yes                                        | 69 (10.0)         | 198 (15.8)         | 122 (18.1)                         | 71 (13.7)            | 5 (8.5)       |
| No                                         | 618 (90.0)        | 1057 (84.2)        | 554 (82.0)                         | 449 (86.4)           | 54 (91.5)     |
| Total physical activity score <sup>c</sup> | 321 (319)         | 264 (316)          | 230 (290)                          | 311 (344)            | 365 (412.5)   |

Note: Values presented are mean ± standard deviation or number (percentage) except where noted. Percentages may not sum to 100 due to rounding. Conversion factors for units: Fasting glucose in mg/dl to mmol/L, x0.05551. LDL-C in mg/dl to mmol/L, x0.02586.

Abbreviations: BMI, body mass index; BP, blood pressure; CARDIA, Coronary Artery Risk Development in Young Adults; CKD, chronic kidney disease; eGFR, estimated glomerular filtration rate;

LDL-C, low density lipoprotein cholesterol

a. Family history of diabetes could be reported at any exam

b. Missing data as family history of kidney disease was only collected during the year 25 exam.

c. Median (IQR)
