# Supplementary material
Source: PubMed Central journal article supplement (PMC5742081)
Supplement: NIHMS908529-supplement-2.pdf [file NIHMS908529-supplement-2.pdf]

**Table S2. Cumulative incidence of CKD by GDM status among all CARDIA women reporting births at exam years 0, 10, 15, 20 and 25**

| Interval              | # events | # at risk | Incidence (95% CI)              |
|-----------------------|----------|-----------|---------------------------------|
| <b>GDM</b>            |          |           |                                 |
| 0                     | 0        | 103       | 0 (0,0)                         |
| 10                    | 6        | 97        | 0.062 (0.014, 0.110) at year 10 |
| 15                    | 4        | 111       | 0.096 (0.039, 0.152) at year 15 |
| 20                    | 4        | 107       | 0.129 (0.066, 0.193) at year 20 |
| 25                    | 8        | 98        | 0.201 (0.126, 0.275) at year 25 |
| <b>Parous, no GDM</b> |          |           |                                 |
| 0                     | 0        | 807       | 0 (0,0)                         |
| 10                    | 33       | 774       | 0.043 (0.028, 0.057) at year 10 |
| 15                    | 22       | 791       | 0.069 (0.052, 0.087) at year 15 |
| 20                    | 48       | 756       | 0.128 (0.105, 0.151) at year 20 |
| 25                    | 34       | 756       | 0.168 (0.142,0.193) at year 25  |

Abbreviations: CARDIA, Coronary Artery Risk Development in Young Adults; CI, confidence interval; CKD, chronic kidney disease; GDM, gestational diabetes mellitus
